# Supplementary material
Source: PubMed Central journal article supplement (PMC2898335)
Supplement: supp_M109.085506_jbc.M109.085506-1.pdf [file supp_M109.085506_jbc.M109.085506-1.pdf]

| Gene        | Name / Function                                  | fold change | p value |
|-------------|--------------------------------------------------|-------------|---------|
| <i>cysD</i> | Sulfate adenylyltransferase                      | 8.74        | 0.00    |
| <i>katG</i> | Catalase hydrogen peroxidase I                   | 7.83        | 0.00    |
| <i>cysJ</i> | Sulfite reductase, beta-subunit                  | 7.62        | 0.01    |
| <i>cysC</i> | Adenylylsulfate kinase                           | 5.97        | 0.00    |
| <i>ibpA</i> | Small heat shock protein                         | 5.92        | 0.00    |
| <i>mcbA</i> | Colanic acid production                          | 5.76        | 0.01    |
| <i>acpD</i> | ACP phosphodiesterase                            | 5.67        | 0.02    |
| <i>cysP</i> | Periplasmic sulfate binding protein              | 5.63        | 0.01    |
| <i>ybiJ</i> | Function unknown                                 | 5.58        | 0.03    |
| <i>cysW</i> | Sulfate transport system permease                | 5.57        | 0.01    |
| <i>cysA</i> | Sulfate-transporting ATPase                      | 5.37        | 0.01    |
| <i>cysK</i> | Cysteine synthase A                              | 5.32        | 0.01    |
| <i>cysU</i> | Sulfate transport system permease                | 5.24        | 0.00    |
| <i>grxA</i> | Glutaredoxin 1                                   | 5.23        | 0.00    |
| <i>argI</i> | Ornithine transcarbamylase                       | 5.06        | 0.01    |
| <i>cbl</i>  | HTH-type transcriptional regulator               | 4.99        | 0.00    |
| <i>cysN</i> | Sulfate adenylyltransferase subunit I            | 4.92        | 0.00    |
| <i>yeeE</i> | UPF0394 inner membrane protein                   | 4.46        | 0.01    |
| <i>ylaC</i> | Inner membrane protein                           | 4.22        | 0.01    |
| <i>ygbE</i> | Inner membrane protein                           | 4.15        | 0.02    |
| <i>sufE</i> | Cysteine desulfuration protein                   | 3.87        | 0.01    |
| <i>pstS</i> | Phosphate-transport protein                      | 3.81        | 0.04    |
| <i>pstB</i> | phosphate import ATP-binding protein             | 3.80        | 0.05    |
| <i>iscR</i> | HTH-type transcriptional regulator               | 3.77        | 0.02    |
| <i>yeaJ</i> | Function unknown                                 | 3.72        | 0.01    |
| <i>ahpF</i> | Alkyl hydroperoxide reductase                    | 3.52        | 0.02    |
| <i>sufS</i> | Cysteine desulfurase                             | 3.52        | 0.02    |
| <i>nlpA</i> | Lipoprotein 28                                   | 3.44        | 0.02    |
| <i>iscS</i> | Cysteine desulfurase                             | 3.27        | 0.02    |
| <i>gsiD</i> | Glutathione transport system permease            | 3.22        | 0.03    |
| <i>ydjN</i> | Uncharacterised symporter                        | 3.21        | 0.01    |
| <i>argA</i> | Amino-acid acetyltransferase                     | 3.18        | 0.04    |
| <i>yciW</i> | Function unknown                                 | 3.05        | 0.01    |
| <i>bhsA</i> | Multiple stress resistance protein               | 2.99        | 0.04    |
| <i>iscU</i> | nifU-like protein                                | 2.93        | 0.04    |
| <i>norR</i> | NO reductase transcription regulator             | 2.89        | 0.04    |
| <i>ahpC</i> | Alkyl hydroperoxide reductase                    | 2.85        | 0.02    |
| <i>fliY</i> | Cystine-binding protein                          | 2.79        | 0.05    |
| <i>rnfE</i> | Electron transport complex protein               | 2.79        | 0.01    |
| <i>pstC</i> | Phosphate transport system permease              | 2.72        | 0.01    |
| <i>yncE</i> | Function unknown                                 | 2.70        | 0.00    |
| <i>iaaA</i> | Isoaspartyl peptidase                            | 2.69        | 0.04    |
| <i>argD</i> | Acetylmethionine aminotransferase                | 2.68        | 0.04    |
| <i>pstA</i> | Phosphate transport system permease              | 2.58        | 0.03    |
| <i>mltD</i> | Murein hydrolase D                               | 2.54        | 0.03    |
| <i>argC</i> | N-acetyl- $\gamma$ -glutamyl-phosphate reductase | 2.49        | 0.01    |
| <i>argB</i> | Acetylglutamate kinase                           | 2.47        | 0.02    |
| <i>ykgI</i> | Function unknown                                 | 2.47        | 0.05    |
| <i>fabA</i> | $\beta$ -hydroxydecanoylthioester dehydrase      | 2.41        | 0.00    |
| <i>argE</i> | Acetylmethionine deacetylase                     | 2.25        | 0.04    |
| <i>rnfC</i> | Electron transport complex protein               | 2.25        | 0.01    |
| <i>rplS</i> | 50S ribosomal protein L19                        | 2.18        | 0.04    |
| <i>marA</i> | Multiple antibiotic resistance protein           | 2.13        | 0.05    |
| <i>lon</i>  | ATP-dependent protease La                        | 2.05        | 0.03    |
| <i>rsxP</i> | Inner membrane protein                           | 2.03        | 0.04    |

Supplemental Table 1. Full microarray list of the genes upregulated in response to peroxynitrite exposure. The mean fold change in individual gene expression after exposure to 300  $\mu$ M peroxynitrite compared with unstressed controls grown aerobically is shown for upregulated genes over the threshold of 2-fold change.
