# Supplementary material
Source: PubMed Central journal article supplement (PMC2898335)
Supplement: supp_M109.085506_jbc.M109.085506-2.pdf [file supp_M109.085506_jbc.M109.085506-2.pdf]

| Gene        | Name / Function                               | fold change | p value |
|-------------|-----------------------------------------------|-------------|---------|
| <i>lsrB</i> | Autoinducer 2-binding protein                 | -3.13       | 0.00    |
| <i>ydcS</i> | Putative ABC-transporter                      | -2.95       | 0.01    |
| <i>argT</i> | Lys-, Arg-, Orn-binding protein               | -2.93       | 0.01    |
| <i>gatC</i> | Galactitol permease IIC component             | -2.91       | 0.01    |
| <i>lsrA</i> | Autoinducer 2 import ATP-binding protein      | -2.83       | 0.04    |
| <i>ompW</i> | Outer membrane protein                        | -2.78       | 0.01    |
| <i>lsrD</i> | Autoinducer 2 import system permease          | -2.77       | 0.00    |
| <i>cstA</i> | Carbon starvation protein                     | -2.76       | 0.03    |
| <i>yihV</i> | Uncharacterised sugar kinase                  | -2.69       | 0.01    |
| <i>pyrI</i> | Aspartate carbomytransferase subunit          | -2.65       | 0.00    |
| <i>ydcA</i> | Function unknown                              | -2.62       | 0.01    |
| <i>purC</i> | SAICAR synthetase                             | -2.53       | 0.01    |
| <i>yahJ</i> | Function unknown                              | -2.47       | 0.04    |
| <i>yjch</i> | Inner membrane protein                        | -2.47       | 0.05    |
| <i>putP</i> | Sodium/proline symporter                      | -2.40       | 0.02    |
| <i>ytfQ</i> | ABC transporter                               | -2.38       | 0.01    |
| <i>aldA</i> | Lactaldehyde dehydrogenase                    | -2.37       | 0.03    |
| <i>pyrB</i> | Aspartate carbomytransferase subunit          | -2.37       | 0.03    |
| <i>paaJ</i> | $\beta$ -ketoacyl-CoA thiolase                | -2.36       | 0.01    |
| <i>fadA</i> | 3-ketoacyl-CoA thiolase                       | -2.35       | 0.02    |
| <i>gatB</i> | Galactitol-specific phosphotransferase        | -2.32       | 0.03    |
| <i>lldP</i> | L-lactate permease                            | -2.28       | 0.05    |
| <i>rhtC</i> | Threonine efflux protein                      | -2.27       | 0.03    |
| <i>chpB</i> | PemK-like protein 2                           | -2.26       | 0.05    |
| <i>csiD</i> | Function unknown                              | -2.23       | 0.04    |
| <i>fadB</i> | Fatty acid oxidation complex subunit $\alpha$ | -2.23       | 0.05    |
| <i>purE</i> | AIR carboxylase                               | -2.19       | 0.03    |
| <i>glpT</i> | Glycerol-3-phosphate transporter              | -2.18       | 0.03    |
| <i>purK</i> | AIR carboxylase                               | -2.16       | 0.03    |
| <i>frdD</i> | Fumarate reductase subunit D                  | -2.16       | 0.04    |
| <i>cspC</i> | Cold shock-like protein                       | -2.15       | 0.04    |
| <i>yliJ</i> | Uncharacterized GST-like protein              | -2.15       | 0.03    |
| <i>arcC</i> | Carbamate kinase                              | -2.09       | 0.03    |
| <i>glpB</i> | Anaerobic G3Pdhase B                          | -2.09       | 0.04    |
| <i>yfaP</i> | Function unknown                              | -2.08       | 0.05    |
| <i>mglB</i> | D-galactose-binding periplasmic protein       | -2.08       | 0.03    |
| <i>fadI</i> | 3-ketoacyl-CoA thiolase                       | -2.06       | 0.04    |
| <i>ygeY</i> | Function unknown                              | -2.02       | 0.04    |
| <i>thiQ</i> | Thiamine import ATP-binding protein           | -2.01       | 0.04    |

Supplemental Table 2. Full microarray list of the genes downregulated in response to peroxyxynitrite exposure. The mean fold change in individual gene expression after exposure to 300  $\mu$ M peroxyxynitrite compared with unstressed controls grown aerobically is shown for downregulated genes over the threshold of 2-fold change.
